# Supplementary material for: Exploring Links Between Psychosis and Frontotemporal Dementia Using Multimodal Machine Learning: Dementia Praecox Revisited
Source: PubMed Central journal article supplement (PMC9350851; doi:10.1001/jamapsychiatry.2022.2075), 2022-08-03
Supplement: jamapsychiatry-e222075-s002.pdf [file jamapsychiatry-e222075-s002.pdf]

\*First name, last name, and suffix (if applicable) are required and will appear in PubMed.

| <b>*Group Name(s): The International FTD-Genetics Consortium (IFGC), the German Frontotemporal Lobar Degeneration (FTLD) Consortium, and the PRONIA Consortium</b> |                        |                              |                         |                                                                                           |                                                 |                                                                |                                                                                                   |
|--------------------------------------------------------------------------------------------------------------------------------------------------------------------|------------------------|------------------------------|-------------------------|-------------------------------------------------------------------------------------------|-------------------------------------------------|----------------------------------------------------------------|---------------------------------------------------------------------------------------------------|
| <b>*First Name and Middle Initial(s)</b>                                                                                                                           | <b>*Last Name</b>      | <b>*Suffix (eg, Jr, III)</b> | <b>Academic Degrees</b> | <b>Institution</b>                                                                        | <b>Location (city, state/province, country)</b> | <b>Role or Contribution, eg, chair, principal investigator</b> | <b>Group (if more than 1 Group listed in the byline) and/or Subgroup (eg, Steering Committee)</b> |
| Shalaila                                                                                                                                                           | Haas                   |                              |                         | Department of Psychiatry and Psychotherapy, Ludwig-Maximilian-University, Munich, Germany | Munich, Germany                                 | Researcher                                                     | PRONIA                                                                                            |
| Alkomiet                                                                                                                                                           | Hasan                  |                              |                         | Department of Psychiatry and Psychotherapy, Ludwig-Maximilian-University, Munich, Germany | Munich, Germany                                 | Researcher                                                     | PRONIA                                                                                            |
| Claudius                                                                                                                                                           | Hoff                   |                              |                         | Department of Psychiatry and Psychotherapy, Ludwig-Maximilian-University, Munich, Germany | Munich, Germany                                 | Researcher                                                     | PRONIA                                                                                            |
| Ifrah                                                                                                                                                              | Khanyaree              |                              |                         | Department of Psychiatry and Psychotherapy, Ludwig-Maximilian-University, Munich, Germany | Munich, Germany                                 | Researcher                                                     | PRONIA                                                                                            |
| Aylin                                                                                                                                                              | Melo                   |                              |                         | Department of Psychiatry and Psychotherapy, Ludwig-Maximilian-University, Munich, Germany | Munich, Germany                                 | Researcher                                                     | PRONIA                                                                                            |
| Susanna                                                                                                                                                            | Muckenhuber-Sternbauer |                              |                         | Department of Psychiatry and Psychotherapy, Ludwig-Maximilian-University, Munich, Germany | Munich, Germany                                 | Researcher                                                     | PRONIA                                                                                            |
| Yanis                                                                                                                                                              | Köhler                 |                              |                         | Department of Psychiatry and Psychotherapy, Ludwig-Maximilian-University, Munich, Germany | Munich, Germany                                 | Researcher                                                     | PRONIA                                                                                            |
| Ömer                                                                                                                                                               | Öztürk                 |                              |                         | Department of Psychiatry and Psychotherapy, Ludwig-Maximilian-University, Munich, Germany | Munich, Germany                                 | Researcher                                                     | PRONIA                                                                                            |
| Nora                                                                                                                                                               | Penzel                 |                              |                         | Department of Psychiatry and Psychotherapy, Ludwig-Maximilian-University, Munich, Germany | Munich, Germany                                 | Researcher                                                     | PRONIA                                                                                            |

## Supplemental Online Content: Nonauthor Collaborators

\*First name, last name, and suffix (if applicable) are required and will appear in PubMed.

| *First Name and Middle Initial(s) | *Last Name   | *Suffix (eg, Jr, III) | Academic Degrees | Institution                                                                               | Location (city, state/province, country) | Role or Contribution, eg, chair, principal investigator | Group (if more than 1 Group listed in the byline) and/or Subgroup (eg, Steering Committee) |
|-----------------------------------|--------------|-----------------------|------------------|-------------------------------------------------------------------------------------------|------------------------------------------|---------------------------------------------------------|--------------------------------------------------------------------------------------------|
| Adrian                            | Rangnick     |                       |                  | Department of Psychiatry and Psychotherapy, Ludwig-Maximilian-University, Munich, Germany | Munich, Germany                          | Researcher                                              | PRONIA                                                                                     |
| Sebastian                         | von Saldern  |                       |                  | Department of Psychiatry and Psychotherapy, Ludwig-Maximilian-University, Munich, Germany | Munich, Germany                          | Researcher                                              | PRONIA                                                                                     |
| Moritz                            | Spangemacher |                       |                  | Department of Psychiatry and Psychotherapy, Ludwig-Maximilian-University, Munich, Germany | Munich, Germany                          | Researcher                                              | PRONIA                                                                                     |
| Ana                               | Tupac        |                       |                  | Department of Psychiatry and Psychotherapy, Ludwig-Maximilian-University, Munich, Germany | Munich, Germany                          | Researcher                                              | PRONIA                                                                                     |
| Johanna                           | Weiske       |                       |                  | Department of Psychiatry and Psychotherapy, Ludwig-Maximilian-University, Munich, Germany | Munich, Germany                          | Researcher                                              | PRONIA                                                                                     |
| Antonia                           | Wosgien      |                       |                  | Department of Psychiatry and Psychotherapy, Ludwig-Maximilian-University, Munich, Germany | Munich, Germany                          | Researcher                                              | PRONIA                                                                                     |
| Camilla                           | Krämer       |                       |                  | Department of Psychiatry and Psychotherapy, Ludwig-Maximilian-University, Munich, Germany | Munich, Germany                          | Researcher                                              | PRONIA                                                                                     |
| Karsten                           | Blume        |                       |                  | Department of Psychiatry and Psychotherapy, University of Cologne, Cologne, Germany       | Cologne, Germany                         | Researcher                                              | PRONIA                                                                                     |
| Dennis                            | Hedderich    |                       |                  | Department of Psychiatry and Psychotherapy, University of Cologne, Cologne, Germany       | Cologne, Germany                         | Researcher                                              | PRONIA                                                                                     |
| Dominika                          | Julkowski    |                       |                  | Department of Psychiatry and Psychotherapy, University of Cologne, Cologne, Germany       | Cologne, Germany                         | Researcher                                              | PRONIA                                                                                     |

## Supplemental Online Content: Nonauthor Collaborators

\*First name, last name, and suffix (if applicable) are required and will appear in PubMed.

| *First Name and Middle Initial(s) | *Last Name   | *Suffix (eg, Jr, III) | Academic Degrees | Institution                                                                                       | Location (city, state/province, country) | Role or Contribution, eg, chair, principal investigator | Group (if more than 1 Group listed in the byline) and/or Subgroup (eg, Steering Committee) |
|-----------------------------------|--------------|-----------------------|------------------|---------------------------------------------------------------------------------------------------|------------------------------------------|---------------------------------------------------------|--------------------------------------------------------------------------------------------|
| Nathalie                          | Kaiser       |                       |                  | Department of Psychiatry and Psychotherapy, University of Cologne, Cologne, Germany               | Cologne, Germany                         | Researcher                                              | PRONIA                                                                                     |
| Thorsten                          | Lichtenstein |                       |                  | Department of Psychiatry and Psychotherapy, University of Cologne, Cologne, Germany               | Cologne, Germany                         | Researcher                                              | PRONIA                                                                                     |
| Ruth                              | Milz         |                       |                  | Department of Psychiatry and Psychotherapy, University of Cologne, Cologne, Germany               | Cologne, Germany                         | Researcher                                              | PRONIA                                                                                     |
| Alexandra                         | Nikolaides   |                       |                  | Department of Psychiatry and Psychotherapy, University of Cologne, Cologne, Germany               | Cologne, Germany                         | Researcher                                              | PRONIA                                                                                     |
| Tanja                             | Pilgram      |                       |                  | Department of Psychiatry and Psychotherapy, University of Cologne, Cologne, Germany               | Cologne, Germany                         | Researcher                                              | PRONIA                                                                                     |
| Mauro                             | Seves        |                       |                  | Department of Psychiatry and Psychotherapy, University of Cologne, Cologne, Germany               | Cologne, Germany                         | Researcher                                              | PRONIA                                                                                     |
| Martina                           | Wassen       |                       |                  | Department of Psychiatry and Psychotherapy, University of Cologne, Cologne, Germany               | Cologne, Germany                         | Researcher                                              | PRONIA                                                                                     |
| Christina                         | Andreou      |                       |                  | Department of Psychiatry (Psychiatric University Hospital, UPK), University of Basel, Switzerland | Basel, Switzerland                       | Researcher                                              | PRONIA                                                                                     |
| Laura                             | Egloff       |                       |                  | Department of Psychiatry (Psychiatric University Hospital, UPK), University of Basel, Switzerland | Basel, Switzerland                       | Researcher                                              | PRONIA                                                                                     |
| Fabienne                          | Harrisberger |                       |                  | Department of Psychiatry (Psychiatric University Hospital, UPK), University of Basel, Switzerland | Basel, Switzerland                       | Researcher                                              | PRONIA                                                                                     |

## Supplemental Online Content: Nonauthor Collaborators

\*First name, last name, and suffix (if applicable) are required and will appear in PubMed.

| *First Name and Middle Initial(s) | *Last Name      | *Suffix (eg, Jr, III) | Academic Degrees | Institution                                                                                       | Location (city, state/province, country) | Role or Contribution, eg, chair, principal investigator | Group (if more than 1 Group listed in the byline) and/or Subgroup (eg, Steering Committee) |
|-----------------------------------|-----------------|-----------------------|------------------|---------------------------------------------------------------------------------------------------|------------------------------------------|---------------------------------------------------------|--------------------------------------------------------------------------------------------|
| Ulrike                            | Heitz           |                       |                  | Department of Psychiatry (Psychiatric University Hospital, UPK), University of Basel, Switzerland | Basel, Switzerland                       | Researcher                                              | PRONIA                                                                                     |
| Claudia                           | Lenz            |                       |                  | Department of Psychiatry (Psychiatric University Hospital, UPK), University of Basel, Switzerland | Basel, Switzerland                       | Researcher                                              | PRONIA                                                                                     |
| Letizia                           | Leanza          |                       |                  | Department of Psychiatry (Psychiatric University Hospital, UPK), University of Basel, Switzerland | Basel, Switzerland                       | Researcher                                              | PRONIA                                                                                     |
| Amatya                            | Mackintosh      |                       |                  | Department of Psychiatry (Psychiatric University Hospital, UPK), University of Basel, Switzerland | Basel, Switzerland                       | Researcher                                              | PRONIA                                                                                     |
| Renata                            | Smieskova       |                       |                  | Department of Psychiatry (Psychiatric University Hospital, UPK), University of Basel, Switzerland | Basel, Switzerland                       | Researcher                                              | PRONIA                                                                                     |
| Erich                             | Studerus        |                       |                  | Department of Psychiatry (Psychiatric University Hospital, UPK), University of Basel, Switzerland | Basel, Switzerland                       | Researcher                                              | PRONIA                                                                                     |
| Anna                              | Walter          |                       |                  | Department of Psychiatry (Psychiatric University Hospital, UPK), University of Basel, Switzerland | Basel, Switzerland                       | Researcher                                              | PRONIA                                                                                     |
| Sonja                             | Widmayer        |                       |                  | Department of Psychiatry (Psychiatric University Hospital, UPK), University of Basel, Switzerland | Basel, Switzerland                       | Researcher                                              | PRONIA                                                                                     |
| Chris                             | Day             |                       |                  | Institute of Mental Health & School of Psychology, University of Birmingham, United Kingdom       | Birmingham, United Kingdom               | Researcher                                              | PRONIA                                                                                     |
| Sian                              | Lowri Griffiths |                       |                  | Institute of Mental Health & School of Psychology, University of Birmingham, United Kingdom       | Birmingham, United Kingdom               | Researcher                                              | PRONIA                                                                                     |

## Supplemental Online Content: Nonauthor Collaborators

\*First name, last name, and suffix (if applicable) are required and will appear in PubMed.

| *First Name and Middle Initial(s) | *Last Name  | *Suffix (eg, Jr, III) | Academic Degrees | Institution                                                                                 | Location (city, state/province, country) | Role or Contribution, eg, chair, principal investigator | Group (if more than 1 Group listed in the byline) and/or Subgroup (eg, Steering Committee) |
|-----------------------------------|-------------|-----------------------|------------------|---------------------------------------------------------------------------------------------|------------------------------------------|---------------------------------------------------------|--------------------------------------------------------------------------------------------|
| Mariam                            | Iqbal       |                       |                  | Institute of Mental Health & School of Psychology, University of Birmingham, United Kingdom | Birmingham, United Kingdom               | Researcher                                              | PRONIA                                                                                     |
| Mirabel                           | Pelton      |                       |                  | Institute of Mental Health & School of Psychology, University of Birmingham, United Kingdom | Birmingham, United Kingdom               | Researcher                                              | PRONIA                                                                                     |
| Pavan                             | Mallikarjun |                       |                  | Institute of Mental Health & School of Psychology, University of Birmingham, United Kingdom | Birmingham, United Kingdom               | Researcher                                              | PRONIA                                                                                     |
| Alexandra                         | Stainton    |                       |                  | Institute of Mental Health & School of Psychology, University of Birmingham, United Kingdom | Birmingham, United Kingdom               | Researcher                                              | PRONIA                                                                                     |
| Ashleigh                          | Lin         |                       |                  | Institute of Mental Health & School of Psychology, University of Birmingham, United Kingdom | Birmingham, United Kingdom               | Researcher                                              | PRONIA                                                                                     |
| Paris                             | Lalousis    |                       |                  | Institute of Mental Health & School of Psychology, University of Birmingham, United Kingdom | Birmingham, United Kingdom               | Researcher                                              | PRONIA                                                                                     |
| Alexander                         | Denissoff   |                       |                  | Department of Psychiatry, University of Turku, Finland                                      | Turku, Finland                           | Researcher                                              | PRONIA                                                                                     |
| Anu                               | Ellilä      |                       |                  | Department of Psychiatry, University of Turku, Finland                                      | Turku, Finland                           | Researcher                                              | PRONIA                                                                                     |
| Tiina                             | From        |                       |                  | Department of Psychiatry, University of Turku, Finland                                      | Turku, Finland                           | Researcher                                              | PRONIA                                                                                     |
| Markus                            | Heinimaa    |                       |                  | Department of Psychiatry, University of Turku, Finland                                      | Turku, Finland                           | Researcher                                              | PRONIA                                                                                     |
| Tuula                             | Ilonen      |                       |                  | Department of Psychiatry, University of Turku, Finland                                      | Turku, Finland                           | Researcher                                              | PRONIA                                                                                     |
| Päivi                             | Jalo        |                       |                  | Department of Psychiatry, University of Turku, Finland                                      | Turku, Finland                           | Researcher                                              | PRONIA                                                                                     |

## Supplemental Online Content: Nonauthor Collaborators

\*First name, last name, and suffix (if applicable) are required and will appear in PubMed.

| *First Name and Middle Initial(s) | *Last Name  | *Suffix (eg, Jr, III) | Academic Degrees | Institution                                                                                                      | Location (city, state/province, country) | Role or Contribution, eg, chair, principal investigator | Group (if more than 1 Group listed in the byline) and/or Subgroup (eg, Steering Committee) |
|-----------------------------------|-------------|-----------------------|------------------|------------------------------------------------------------------------------------------------------------------|------------------------------------------|---------------------------------------------------------|--------------------------------------------------------------------------------------------|
| Heikki                            | Laurikainen |                       |                  | Department of Psychiatry, University of Turku, Finland                                                           | Turku, Finland                           | Researcher                                              | PRONIA                                                                                     |
| Antti                             | Luutonen    |                       |                  | Department of Psychiatry, University of Turku, Finland                                                           | Turku, Finland                           | Researcher                                              | PRONIA                                                                                     |
| Akseli                            | Mäkela      |                       |                  | Department of Psychiatry, University of Turku, Finland                                                           | Turku, Finland                           | Researcher                                              | PRONIA                                                                                     |
| Janina                            | Paju        |                       |                  | Department of Psychiatry, University of Turku, Finland                                                           | Turku, Finland                           | Researcher                                              | PRONIA                                                                                     |
| Henri                             | Pesonen     |                       |                  | Department of Psychiatry, University of Turku, Finland                                                           | Turku, Finland                           | Researcher                                              | PRONIA                                                                                     |
| Reetta-Liina                      | Säilä       |                       |                  | Department of Psychiatry, University of Turku, Finland                                                           | Turku, Finland                           | Researcher                                              | PRONIA                                                                                     |
| Anna                              | Toivonen    |                       |                  | Department of Psychiatry, University of Turku, Finland                                                           | Turku, Finland                           | Researcher                                              | PRONIA                                                                                     |
| Otto                              | Turtonen    |                       |                  | Department of Psychiatry, University of Turku, Finland                                                           | Turku, Finland                           | Researcher                                              | PRONIA                                                                                     |
| Sonja                             | Botterweck  |                       |                  | Department of Psychiatry (Psychiatric University Hospital LVR/HHU Düsseldorf), University of Düsseldorf, Germany | Düsseldorf, Germany                      | Researcher                                              | PRONIA                                                                                     |
| Norman                            | Kluthausen  |                       |                  | Department of Psychiatry (Psychiatric University Hospital LVR/HHU Düsseldorf), University of Düsseldorf, Germany | Düsseldorf, Germany                      | Researcher                                              | PRONIA                                                                                     |
| Gerald                            | Antoch      |                       |                  | Department of Psychiatry (Psychiatric University Hospital LVR/HHU Düsseldorf), University of Düsseldorf, Germany | Düsseldorf, Germany                      | Researcher                                              | PRONIA                                                                                     |

## Supplemental Online Content: Nonauthor Collaborators

\*First name, last name, and suffix (if applicable) are required and will appear in PubMed.

| *First Name and Middle Initial(s) | *Last Name | *Suffix (eg, Jr, III) | Academic Degrees | Institution                                                                                                      | Location (city, state/province, country) | Role or Contribution, eg, chair, principal investigator | Group (if more than 1 Group listed in the byline) and/or Subgroup (eg, Steering Committee) |
|-----------------------------------|------------|-----------------------|------------------|------------------------------------------------------------------------------------------------------------------|------------------------------------------|---------------------------------------------------------|--------------------------------------------------------------------------------------------|
| Julian                            | Caspers    |                       |                  | Department of Psychiatry (Psychiatric University Hospital LVR/HHU Düsseldorf), University of Düsseldorf, Germany | Düsseldorf, Germany                      | Researcher                                              | PRONIA                                                                                     |
| Hans-Jörg                         | Wittsack   |                       |                  | Department of Psychiatry (Psychiatric University Hospital LVR/HHU Düsseldorf), University of Düsseldorf, Germany | Düsseldorf, Germany                      | Researcher                                              | PRONIA                                                                                     |
| Giuseppe                          | Blasi      |                       |                  | Department of Basic Medical Science, Neuroscience and Sense Organs - University of Bari Aldo Moro                | Bari, Italy                              | Researcher                                              | PRONIA                                                                                     |
| Giulio                            | Pergola    |                       |                  | Department of Basic Medical Science, Neuroscience and Sense Organs - University of Bari Aldo Moro                | Bari, Italy                              | Researcher                                              | PRONIA                                                                                     |
| Grazia                            | Caforio    |                       |                  | Department of Basic Medical Science, Neuroscience and Sense Organs - University of Bari Aldo Moro                | Bari, Italy                              | Researcher                                              | PRONIA                                                                                     |
| Leonardo                          | Fazio      |                       |                  | Department of Basic Medical Science, Neuroscience and Sense Organs - University of Bari Aldo Moro                | Bari, Italy                              | Researcher                                              | PRONIA                                                                                     |
| Tiziana                           | Quarto     |                       |                  | Department of Basic Medical Science, Neuroscience and Sense Organs - University of Bari Aldo Moro                | Bari, Italy                              | Researcher                                              | PRONIA                                                                                     |
| Barbara                           | Gelao      |                       |                  | Department of Basic Medical Science, Neuroscience and Sense Organs - University of Bari Aldo Moro                | Bari, Italy                              | Researcher                                              | PRONIA                                                                                     |
| Raffaella                         | Romano     |                       |                  | Department of Basic Medical Science, Neuroscience and Sense Organs - University of Bari Aldo Moro                | Bari, Italy                              | Researcher                                              | PRONIA                                                                                     |

## Supplemental Online Content: Nonauthor Collaborators

\*First name, last name, and suffix (if applicable) are required and will appear in PubMed.

| *First Name and Middle Initial(s) | *Last Name  | *Suffix (eg, Jr, III) | Academic Degrees | Institution                                                                                       | Location (city, state/province, country) | Role or Contribution, eg, chair, principal investigator | Group (if more than 1 Group listed in the byline) and/or Subgroup (eg, Steering Committee) |
|-----------------------------------|-------------|-----------------------|------------------|---------------------------------------------------------------------------------------------------|------------------------------------------|---------------------------------------------------------|--------------------------------------------------------------------------------------------|
| Ileana                            | Andriola    |                       |                  | Department of Basic Medical Science, Neuroscience and Sense Organs - University of Bari Aldo Moro | Bari, Italy                              | Researcher                                              | PRONIA                                                                                     |
| Andrea                            | Falsetti    |                       |                  | Department of Basic Medical Science, Neuroscience and Sense Organs - University of Bari Aldo Moro | Bari, Italy                              | Researcher                                              | PRONIA                                                                                     |
| Marina                            | Barone      |                       |                  | Department of Basic Medical Science, Neuroscience and Sense Organs - University of Bari Aldo Moro | Bari, Italy                              | Researcher                                              | PRONIA                                                                                     |
| Roberta                           | Passiatore  |                       |                  | Department of Basic Medical Science, Neuroscience and Sense Organs - University of Bari Aldo Moro | Bari, Italy                              | Researcher                                              | PRONIA                                                                                     |
| Marina                            | Sangiuliano |                       |                  | Department of Basic Medical Science, Neuroscience and Sense Organs - University of Bari Aldo Moro | Bari, Italy                              | Researcher                                              | PRONIA                                                                                     |
| Marian                            | Surmann     |                       |                  | Department of Psychiatry and Psychotherapy of the University of Münster, Germany                  | Münster, Germany                         | Researcher                                              | PRONIA                                                                                     |
| Olga                              | Biemek      |                       |                  | Department of Psychiatry and Psychotherapy of the University of Münster, Germany                  | Münster, Germany                         | Researcher                                              | PRONIA                                                                                     |
| Udo                               | Dannlowski  |                       |                  | Department of Psychiatry and Psychotherapy of the University of Münster, Germany                  | Münster, Germany                         | Researcher                                              | PRONIA                                                                                     |
| Ana Beatriz                       | Solana      |                       |                  | General Electric Global Research Inc., USA                                                        | Munich, Germany                          | Researcher                                              | PRONIA                                                                                     |
| Manuela                           | Abraham     |                       |                  | General Electric Global Research Inc., USA                                                        | Munich, Germany                          | Researcher                                              | PRONIA                                                                                     |
| Timo                              | Schirmer    |                       |                  | General Electric Global Research Inc., USA                                                        | Munich, Germany                          | Researcher                                              | PRONIA                                                                                     |



## Supplemental Online Content: Nonauthor Collaborators

\*First name, last name, and suffix (if applicable) are required and will appear in PubMed.

| *First Name and Middle Initial(s) | *Last Name  | *Suffix (eg, Jr, III) | Academic Degrees | Institution                                                                                              | Location (city, state/province, country) | Role or Contribution, eg, chair, principal investigator | Group (if more than 1 Group listed in the byline) and/or Subgroup (eg, Steering Committee) |
|-----------------------------------|-------------|-----------------------|------------------|----------------------------------------------------------------------------------------------------------|------------------------------------------|---------------------------------------------------------|--------------------------------------------------------------------------------------------|
| Adele                             | Ferro       |                       |                  | University of Milan, Italy                                                                               | Milan, Italy                             | Researcher                                              | PRONIA                                                                                     |
| Marta                             | Re          |                       |                  | University of Milan, Italy                                                                               | Milan, Italy                             | Researcher                                              | PRONIA                                                                                     |
| Maurizio                          | Sberna      |                       |                  | University of Milan, Italy                                                                               | Milan, Italy                             | Researcher                                              | PRONIA                                                                                     |
| Armando                           | D'Agostino  |                       |                  | University of Milan, Italy                                                                               | Milan, Italy                             | Researcher                                              | PRONIA                                                                                     |
| Lorenzo                           | Del Fabro   |                       |                  | University of Milan, Italy                                                                               | Milan, Italy                             | Researcher                                              | PRONIA                                                                                     |
| Giampaolo                         | Perna       |                       |                  | University of Milan, Italy                                                                               | Milan, Italy                             | Researcher                                              | PRONIA                                                                                     |
| Maria                             | Nobile      |                       |                  | University of Milan, Italy                                                                               | Milan, Italy                             | Researcher                                              | PRONIA                                                                                     |
| Matteo                            | Balestrieri |                       |                  | University of Udine, Italy                                                                               | Udine, Italy                             | Researcher                                              | PRONIA                                                                                     |
| Carolina                          | Bonivento   |                       |                  | University of Udine, Italy                                                                               | Udine, Italy                             | Researcher                                              | PRONIA                                                                                     |
| Giuseppe                          | Cabras      |                       |                  | University of Udine, Italy                                                                               | Udine, Italy                             | Researcher                                              | PRONIA                                                                                     |
| Franco                            | Fabbro      |                       |                  | University of Udine, Italy                                                                               | Udine, Italy                             | Researcher                                              | PRONIA                                                                                     |
| Giuseppe                          | Delvecchio  |                       |                  | IRCCS Policlinico of Milan, Italy                                                                        | Milan, Italy                             | Researcher                                              | PRONIA                                                                                     |
| Eleonora                          | Maggioni    |                       |                  | IRCCS Policlinico of Milan, Italy                                                                        | Milan, Italy                             | Researcher                                              | PRONIA                                                                                     |
| Letizia                           | Squarcina   |                       |                  | University of Milan, Italy                                                                               | Milan, Italy                             | Researcher                                              | PRONIA                                                                                     |
| Davide                            | Gritti      |                       |                  | IRCCS Policlinico of Milan, Italy                                                                        | Milan, Italy                             | Researcher                                              | PRONIA                                                                                     |
| Maria Gloria                      | Rossetti    |                       |                  | IRCCS Policlinico of Milan                                                                               | Milan, Italy                             | Researcher                                              | PRONIA                                                                                     |
| Raffaele                          | Ferrari     |                       |                  | University College London, Department of Molecular Neuroscience                                          | London, UK                               | Researcher                                              | IFGC                                                                                       |
| Dena                              | Hernandez   |                       |                  | Laboratory of Neurogenetics, National Institute on Aging, National Institutes of Health                  | Bethesda, USA                            | Researcher                                              | IFGC                                                                                       |
| Michael                           | Nalls       |                       |                  | Laboratory of Neurogenetics, National Institute on Aging, National Institutes of Health                  | Bethesda, USA                            | Researcher                                              | IFGC                                                                                       |
| Jonathan                          | Rohrer      |                       |                  | Reta Lila Weston Research Laboratories, Department of Molecular Neuroscience, UCL Institute of Neurology | London, UK                               | Researcher                                              | IFGC                                                                                       |
| Adaikalavan                       | Ramasamy    |                       |                  | Reta Lila Weston Research Laboratories, Department of Molecular Neuroscience, UCL Institute of Neurology | London, UK                               | Researcher                                              | IFGC                                                                                       |

## Supplemental Online Content: Nonauthor Collaborators

\*First name, last name, and suffix (if applicable) are required and will appear in PubMed.

| *First Name and Middle Initial(s) | *Last Name   | *Suffix (eg, Jr, III) | Academic Degrees | Institution                                                                                   | Location (city, state/province, country) | Role or Contribution, eg, chair, principal investigator | Group (if more than 1 Group listed in the byline) and/or Subgroup (eg, Steering Committee) |
|-----------------------------------|--------------|-----------------------|------------------|-----------------------------------------------------------------------------------------------|------------------------------------------|---------------------------------------------------------|--------------------------------------------------------------------------------------------|
| John                              | Kwok         |                       |                  | Neuroscience Research Australia                                                               | Sydney, Australia                        | Researcher                                              | IFGC                                                                                       |
| Carol                             | Dobson-Stone |                       |                  | Neuroscience Research Australia                                                               | Sydney, Australia                        | Researcher                                              | IFGC                                                                                       |
| William                           | Brooks       |                       |                  | Neuroscience Research Australia                                                               | Sydney, Australia                        | Researcher                                              | IFGC                                                                                       |
| Peter                             | Schofield    |                       |                  | Neuroscience Research Australia                                                               | Sydney, Australia                        | Researcher                                              | IFGC                                                                                       |
| Glenda                            | Halliday     |                       |                  | Neuroscience Research Australia                                                               | Sydney, Australia                        | Researcher                                              | IFGC                                                                                       |
| John                              | Hodges       |                       |                  | Neuroscience Research Australia                                                               | Sydney, Australia                        | Researcher                                              | IFGC                                                                                       |
| Olivier                           | Piguet       |                       |                  | Neuroscience Research Australia                                                               | Sydney, Australia                        | Researcher                                              | IFGC                                                                                       |
| Lauren                            | Bartley      |                       |                  | Neuroscience Research Australia                                                               | Sydney, Australia                        | Researcher                                              | IFGC                                                                                       |
| Elizabeth                         | Thompson     |                       |                  | South Australian Clinical Genetics Service, SA Pathology                                      | North Adelaide, Australia                | Researcher                                              | IFGC                                                                                       |
| Isabel                            | Hernández    |                       |                  | Research Center and Memory Clinic of Fundació ACE, Institut Català de Neurociències Aplicades | Barcelona, Spain                         | Researcher                                              | IFGC                                                                                       |
| Agustín                           | Ruiz         |                       |                  | Research Center and Memory Clinic of Fundació ACE, Institut Català de Neurociències Aplicades | Barcelona, Spain                         | Researcher                                              | IFGC                                                                                       |
| Mercè                             | Boada        |                       |                  | Research Center and Memory Clinic of Fundació ACE, Institut Català de Neurociències Aplicades | Barcelona, Spain                         | Researcher                                              | IFGC                                                                                       |
| Barbara                           | Borroni      |                       |                  | Neurology Clinic, University of Brescia                                                       | Brescia, Italy                           | Researcher                                              | IFGC                                                                                       |
| Alessandro                        | Padovani     |                       |                  | Neurology Clinic, University of Brescia                                                       | Brescia, Italy                           | Researcher                                              | IFGC                                                                                       |
| Carlos                            | Cruchaga     |                       |                  | Department of Psychiatry, Washington University                                               | St. Louis, MO, USA                       | Researcher                                              | IFGC                                                                                       |
| Nigel                             | Cairns       |                       |                  | Hope Center, Washington University School of Medicine                                         | St. Louis, MO, USA                       | Researcher                                              | IFGC                                                                                       |
| Luisa                             | Benussi      |                       |                  | Molecular Markers Laboratory, IRCCS Istituto Centro San Giovanni di Dio Fatebenefratelli      | Brescia, Italy                           | Researcher                                              | IFGC                                                                                       |

## Supplemental Online Content: Nonauthor Collaborators

\*First name, last name, and suffix (if applicable) are required and will appear in PubMed.

| *First Name and Middle Initial(s) | *Last Name | *Suffix (eg, Jr, III) | Academic Degrees | Institution                                                                                                                                           | Location (city, state/province, country) | Role or Contribution, eg, chair, principal investigator | Group (if more than 1 Group listed in the byline) and/or Subgroup (eg, Steering Committee) |
|-----------------------------------|------------|-----------------------|------------------|-------------------------------------------------------------------------------------------------------------------------------------------------------|------------------------------------------|---------------------------------------------------------|--------------------------------------------------------------------------------------------|
| Giuliano                          | Binetti    |                       |                  | MAC Memory Clinic, IRCCS Istituto Centro San Giovanni di Dio Fatebenefratelli                                                                         | Brescia, Italy                           | Researcher                                              | IFGC                                                                                       |
| Roberta                           | Ghidoni    |                       |                  | Molecular Markers Laboratory, IRCCS Istituto Centro San Giovanni di Dio Fatebenefratelli                                                              | Brescia, Italy                           | Researcher                                              | IFGC                                                                                       |
| Gianluigi                         | Forloni    |                       |                  | Biology of Neurodegenerative Disorders, IRCCS Istituto di Ricerche Farmacologiche, "Mario Negri"                                                      | Milan, Italy                             | Researcher                                              | IFGC                                                                                       |
| Diego                             | Albani     |                       |                  | Biology of Neurodegenerative Disorders, IRCCS Istituto di Ricerche Farmacologiche, "Mario Negri"                                                      | Milan, Italy                             | Researcher                                              | IFGC                                                                                       |
| Daniela                           | Galimberti |                       |                  | Fondazione Cà Granda, IRCCS Ospedale Maggiore Policlinico; University of Milan                                                                        | Milan, Italy                             | Researcher                                              | IFGC                                                                                       |
| Chiara                            | Fenoglio   |                       |                  | Fondazione Cà Granda, IRCCS Ospedale Maggiore Policlinico; University of Milan                                                                        | Milan, Italy                             | Researcher                                              | IFGC                                                                                       |
| Maria                             | Serpente   |                       |                  | Fondazione Cà Granda, IRCCS Ospedale Maggiore Policlinico; University of Milan                                                                        | Milan, Italy                             | Researcher                                              | IFGC                                                                                       |
| Elio                              | Scarpini   |                       |                  | Fondazione Cà Granda, IRCCS Ospedale Maggiore Policlinico; University of Milan                                                                        | Milan, Italy                             | Researcher                                              | IFGC                                                                                       |
| Jordi                             | Clarimón   |                       |                  | Memory Unit, Neurology Department and Sant Pau Biomedical Research Institute, Hospital de la Santa Creu i Sant Pau, Universitat Autònoma de Barcelona | Barcelona, Spain                         | Researcher                                              | IFGC                                                                                       |
| Alberto                           | Lleó       |                       |                  | Memory Unit, Neurology Department and Sant Pau Biomedical Research Institute, Hospital de la Santa Creu i Sant Pau, Universitat Autònoma de Barcelona | Barcelona, Spain                         | Researcher                                              | IFGC                                                                                       |

## Supplemental Online Content: Nonauthor Collaborators

\*First name, last name, and suffix (if applicable) are required and will appear in PubMed.

| *First Name and Middle Initial(s) | *Last Name      | *Suffix (eg, Jr, III) | Academic Degrees | Institution                                                                                                                                                                                                      | Location (city, state/province, country) | Role or Contribution, eg, chair, principal investigator | Group (if more than 1 Group listed in the byline) and/or Subgroup (eg, Steering Committee) |
|-----------------------------------|-----------------|-----------------------|------------------|------------------------------------------------------------------------------------------------------------------------------------------------------------------------------------------------------------------|------------------------------------------|---------------------------------------------------------|--------------------------------------------------------------------------------------------|
| Rafael                            | Blesa           |                       |                  | Memory Unit, Neurology Department and Sant Pau Biomedical Research Institute, Hospital de la Santa Creu i Sant Pau, Universitat Autònoma de Barcelona                                                            | Barcelona, Spain                         | Researcher                                              | IFGC                                                                                       |
| Maria                             | Landqvist Waldö |                       |                  | Unit of Geriatric Psychiatry, Department of Clinical Sciences, Lund University                                                                                                                                   | Lund, Sweden                             | Researcher                                              | IFGC                                                                                       |
| Karin                             | Nilsson         |                       |                  | Unit of Geriatric Psychiatry, Department of Clinical Sciences, Lund University                                                                                                                                   | Lund, Sweden                             | Researcher                                              | IFGC                                                                                       |
| Christer                          | Nilsson         |                       |                  | Clinical Memory Research Unit, Department of Clinical Sciences, Lund University                                                                                                                                  | Lund, Sweden                             | Researcher                                              | IFGC                                                                                       |
| Ian                               | Mackenzie       |                       |                  | Department of Pathology and Laboratory Medicine, University of British Columbia                                                                                                                                  | Vancouver, Canada                        | Researcher                                              | IFGC                                                                                       |
| Ging-Yuek                         | Hsiung          |                       |                  | Division of Neurology, University of British Columbia                                                                                                                                                            | Vancouver, Canada                        | Researcher                                              | IFGC                                                                                       |
| David                             | Mann            |                       |                  | Institute of Brain, Behaviour and Mental Health, University of Manchester, Salford Royal Hospital                                                                                                                | Salford, UK                              | Researcher                                              | IFGC                                                                                       |
| Jordan                            | Grafman         |                       |                  | Rehabilitation Institute of Chicago, Departments of Physical Medicine and Rehabilitation, Psychiatry, and Cognitive Neurology & Alzheimer's Disease Center; Feinberg School of Medicine, Northwestern University | Chicago, USA                             | Researcher                                              | IFGC                                                                                       |
| Christopher                       | Morris          |                       |                  | Newcastle Brain Tissue Resource, Institute for Ageing, Newcastle University                                                                                                                                      | Newcastle upon Tyne, UK                  | Researcher                                              | IFGC                                                                                       |

## Supplemental Online Content: Nonauthor Collaborators

\*First name, last name, and suffix (if applicable) are required and will appear in PubMed.

| *First Name and Middle Initial(s) | *Last Name | *Suffix (eg, Jr, III) | Academic Degrees | Institution                                                                                                                    | Location (city, state/province, country) | Role or Contribution, eg, chair, principal investigator | Group (if more than 1 Group listed in the byline) and/or Subgroup (eg, Steering Committee) |
|-----------------------------------|------------|-----------------------|------------------|--------------------------------------------------------------------------------------------------------------------------------|------------------------------------------|---------------------------------------------------------|--------------------------------------------------------------------------------------------|
| Johannes                          | Attems     |                       |                  | Newcastle Brain Tissue Resource, Institute for Ageing, Newcastle University                                                    | Newcastle upon Tyne, UK                  | Researcher                                              | IFGC                                                                                       |
| Ian                               | McKeith    |                       |                  | Newcastle University, Institute of Neuroscience and Institute for Ageing, Campus for Ageing and Vitality, Newcastle University | Newcastle upon Tyne, UK                  | Researcher                                              | IFGC                                                                                       |
| Alan                              | Thomas     |                       |                  | Newcastle University, Institute of Neuroscience and Institute for Ageing, Campus for Ageing and Vitality, Newcastle University | Newcastle upon Tyne, UK                  | Researcher                                              | IFGC                                                                                       |
| Pietro                            | Pietrini   |                       |                  | IMT School for Advanced Studies                                                                                                | Lucca, Italy                             | Researcher                                              | IFGC                                                                                       |
| Edward                            | Huey       |                       |                  | Taub Institute, Departments of Psychiatry and Neurology, Columbia University                                                   | New York, USA                            | Researcher                                              | IFGC                                                                                       |
| Eric                              | Wassermann |                       |                  | Behavioral Neurology Unit, National Institute of Neurological Disorders and Stroke, National Institutes of Health              | Bethesda, USA                            | Researcher                                              | IFGC                                                                                       |
| Atik                              | Baborie    |                       |                  | Department of Laboratory Medicine & Pathology, Walter Mackenzie Health Sciences Centre, University of Alberta Edmonton         | Alberta, Canada                          | Researcher                                              | IFGC                                                                                       |
| Evelyn                            | Jaros      |                       |                  | Newcastle University, Institute for Ageing and Health, Campus for Ageing and Vitality                                          | Newcastle upon Tyne, UK                  | Researcher                                              | IFGC                                                                                       |
| Michael                           | Tierney    |                       |                  | Behavioral Neurology Unit, National Institute of Neurological Disorders and Stroke, National Institutes of Health              | Bethesda, USA                            | Researcher                                              | IFGC                                                                                       |

## Supplemental Online Content: Nonauthor Collaborators

\*First name, last name, and suffix (if applicable) are required and will appear in PubMed.

| *First Name and Middle Initial(s) | *Last Name    | *Suffix (eg, Jr, III) | Academic Degrees | Institution                                                                                                                                        | Location (city, state/province, country) | Role or Contribution, eg, chair, principal investigator | Group (if more than 1 Group listed in the byline) and/or Subgroup (eg, Steering Committee) |
|-----------------------------------|---------------|-----------------------|------------------|----------------------------------------------------------------------------------------------------------------------------------------------------|------------------------------------------|---------------------------------------------------------|--------------------------------------------------------------------------------------------|
| Pau                               | Pastor        |                       |                  | Center for Networker Biomedical Research in Neurodegenerative Diseases (CIBERNED)                                                                  | Madrid, Spain                            | Researcher                                              | IFGC                                                                                       |
| Cristina                          | Razquin       |                       |                  | Neurogenetics Laboratory, Division of Neurosciences, Center for Applied Medical Research, Universidad de Navarra                                   | Pamplona, Spain                          | Researcher                                              | IFGC                                                                                       |
| Sara                              | Ortega-Cubero |                       |                  | Center for Networker Biomedical Research in Neurodegenerative Diseases (CIBERNED)                                                                  | Madrid, Spain                            | Researcher                                              | IFGC                                                                                       |
| Elena                             | Alonso        |                       |                  | Neurogenetics Laboratory, Division of Neurosciences, Center for Applied Medical Research, Universidad de Navarra                                   | Pamplona, Spain                          | Researcher                                              | IFGC                                                                                       |
| Robert                            | Perneckzy     |                       |                  | Neuroepidemiology and Ageing Research Unit, School of Public Health, Faculty of Medicine, The Imperial College of Science, Technology and Medicine | London, UK                               | Researcher                                              | IFGC                                                                                       |
| Panagiotis                        | Alexopoulos   |                       |                  | Department of Psychiatry and Psychotherapy, Technische Universität München                                                                         | Munich, Germany                          | Researcher                                              | IFGC                                                                                       |
| Alexander                         | Kurz          |                       |                  | Department of Psychiatry and Psychotherapy, Technische Universität München                                                                         | Munich, Germany                          | Researcher                                              | IFGC                                                                                       |
| Innocenzo                         | Rainero       |                       |                  | Neurology I, Department of Neuroscience, University of Torino, Italy, A.O. Città della Salute e della Scienza di Torino                            | Torino, Italy                            | Researcher                                              | IFGC                                                                                       |

## Supplemental Online Content: Nonauthor Collaborators

\*First name, last name, and suffix (if applicable) are required and will appear in PubMed.

| *First Name and Middle Initial(s) | *Last Name    | *Suffix (eg, Jr, III) | Academic Degrees | Institution                                                                                                             | Location (city, state/province, country) | Role or Contribution, eg, chair, principal investigator | Group (if more than 1 Group listed in the byline) and/or Subgroup (eg, Steering Committee) |
|-----------------------------------|---------------|-----------------------|------------------|-------------------------------------------------------------------------------------------------------------------------|------------------------------------------|---------------------------------------------------------|--------------------------------------------------------------------------------------------|
| Elisa                             | Rubino        |                       |                  | Neurology I, Department of Neuroscience, University of Torino, Italy, A.O. Città della Salute e della Scienza di Torino | Torino, Italy                            | Researcher                                              | IFGC                                                                                       |
| Lorenzo                           | Pinessi       |                       |                  | Neurology I, Department of Neuroscience, University of Torino, Italy, A.O. Città della Salute e della Scienza di Torino | Torino, Italy                            | Researcher                                              | IFGC                                                                                       |
| Ekaterina                         | Rogaeva       |                       |                  | Tanz Centre for Research in Neurodegenerative Diseases, University of Toronto                                           | Toronto, Ontario, Canada                 | Researcher                                              | IFGC                                                                                       |
| Peter                             | George-Hyslop |                       |                  | Tanz Centre for Research in Neurodegenerative Diseases, University of Toronto                                           | Toronto, Ontario, Canada                 | Researcher                                              | IFGC                                                                                       |
| Giacomina                         | Rossi         |                       |                  | Division of Neurology V and Neuropathology, Fondazione IRCCS Istituto Neurologico Carlo Besta                           | Milan, Italy                             | Researcher                                              | IFGC                                                                                       |
| Fabrizio                          | Tagliavini    |                       |                  | Division of Neurology V and Neuropathology, Fondazione IRCCS Istituto Neurologico Carlo Besta                           | Milan, Italy                             | Researcher                                              | IFGC                                                                                       |
| Giorgio                           | Giaccone      |                       |                  | Division of Neurology V and Neuropathology, Fondazione IRCCS Istituto Neurologico Carlo Besta                           | Milan, Italy                             | Researcher                                              | IFGC                                                                                       |
| James                             | Rowe          |                       |                  | Cambridge University Department of Clinical Neurosciences                                                               | Cambridge, UK                            | Researcher                                              | IFGC                                                                                       |
| Johannes                          | Schlachetzki  |                       |                  | University of California San Diego, Department of Cellular & Molecular Medicine                                         | La Jolla, CA, USA                        | Researcher                                              | IFGC                                                                                       |

## Supplemental Online Content: Nonauthor Collaborators

\*First name, last name, and suffix (if applicable) are required and will appear in PubMed.

| *First Name and Middle Initial(s) | *Last Name   | *Suffix (eg, Jr, III) | Academic Degrees | Institution                                                                                             | Location (city, state/province, country) | Role or Contribution, eg, chair, principal investigator | Group (if more than 1 Group listed in the byline) and/or Subgroup (eg, Steering Committee) |
|-----------------------------------|--------------|-----------------------|------------------|---------------------------------------------------------------------------------------------------------|------------------------------------------|---------------------------------------------------------|--------------------------------------------------------------------------------------------|
| James                             | Uphill       |                       |                  | MRC Prion Unit, Department of Neurodegenerative Disease, UCL Institute of Neurology                     | London, UK                               | Researcher                                              | IFGC                                                                                       |
| John                              | Collinge     |                       |                  | MRC Prion Unit, Department of Neurodegenerative Disease, UCL Institute of Neurology                     | London, UK                               | Researcher                                              | IFGC                                                                                       |
| Simon                             | Mead         |                       |                  | MRC Prion Unit, Department of Neurodegenerative Disease, UCL Institute of Neurology                     | London, UK                               | Researcher                                              | IFGC                                                                                       |
| Vivianna                          | Van Deerlin  |                       |                  | University of Pennsylvania Perelman School of Medicine, Department of Pathology and Laboratory Medicine | Philadelphia, PA, USA                    | Researcher                                              | IFGC                                                                                       |
| Anke                              | Marschhauser |                       | MSc              | Clinic for Cognitive Neurology, University Hospital Leipzig                                             | Leipzig, Germany                         | Pathologist                                             | FTLD-C                                                                                     |
| Frank                             | Regenbrecht  |                       | MSc              | Clinic for Cognitive Neurology, University Hospital Leipzig                                             | Leipzig, Germany                         | Pathologist                                             | FTLD-C                                                                                     |
| Angelika                          | Thoene-Otto  |                       | PhD              | Clinic for Cognitive Neurology, University Hospital Leipzig                                             | Leipzig, Germany                         | Neuropsychologist                                       | FTLD-C                                                                                     |
| Jannis                            | Gordulla     |                       | MSc              | Clinic for Cognitive Neurology, University Hospital Leipzig                                             | Leipzig, Germany                         | MD student                                              | FTLD-C                                                                                     |
| Tommaso                           | Ballarini    |                       | PhD              | Max Planck Institute for Human Cognitive and Brain Sciences                                             | Leipzig, Germany                         | Researcher                                              | FTLD-C                                                                                     |
| Annerose                          | Engel        |                       | PhD              | Clinic for Cognitive Neurology, University Hospital Leipzig                                             | Leipzig, Germany                         | Neuropsychologist                                       | FTLD-C                                                                                     |
| Daniele                           | Pino         |                       | PhD              | Clinic for Cognitive Neurology, University Hospital Leipzig                                             | Leipzig, Germany                         | Pathologist                                             | FTLD-C                                                                                     |
| Dominique                         | Leuthold     |                       | BSc              | Clinic for Cognitive Neurology, University Hospital Leipzig                                             | Leipzig, Germany                         | Orthoptist                                              | FTLD-C                                                                                     |
| Heike                             | Naumann      |                       | BSc              | Clinic for Cognitive Neurology, University Hospital Leipzig                                             | Leipzig, Germany                         | Orthoptist                                              | FTLD-C                                                                                     |



## Supplemental Online Content: Nonauthor Collaborators

\*First name, last name, and suffix (if applicable) are required and will appear in PubMed.

| *First Name and Middle Initial(s) | *Last Name      | *Suffix (eg, Jr, III) | Academic Degrees | Institution                                                                                                                 | Location (city, state/province, country) | Role or Contribution, eg, chair, principal investigator | Group (if more than 1 Group listed in the byline) and/or Subgroup (eg, Steering Committee) |
|-----------------------------------|-----------------|-----------------------|------------------|-----------------------------------------------------------------------------------------------------------------------------|------------------------------------------|---------------------------------------------------------|--------------------------------------------------------------------------------------------|
| Murray                            | Grossman        |                       | MD               | University of Pennsylvania Perelman School of Medicine, Department of Neurology and Penn Frontotemporal Degeneration Center | Philadelphia, PA, USA                    | Professor in Neurology                                  | IFGC                                                                                       |
| John Q                            | Trojanowski     |                       | PhD              | University of Pennsylvania Perelman School of Medicine, Department of Pathology and Laboratory Medicine                     | Philadelphia, PA, USA                    | Researcher                                              | IFGC                                                                                       |
| Julie                             | van der Zee     |                       | PhD              | Neurodegenerative Brain Diseases group, VIB-UAntwerp Center of Molecular Neurology                                          | Antwerp, Belgium                         | Researcher                                              | IFGC                                                                                       |
| Christine                         | Van Broeckhofen |                       | PhD              | Neurodegenerative Brain Diseases group, VIB-UAntwerp Center of Molecular Neurology                                          | Antwerp, Belgium                         | Researcher                                              | IFGC                                                                                       |
| Stefano F                         | Cappa           |                       | MD               | Neurorehabilitation Unit, Dept. Of Clinical Neuroscience, Vita-Salute University and San Raffaele Scientific Institute,     | Milan, Italy                             | Professor in Neurology                                  | IFGC                                                                                       |
| Isabelle                          | Le Ber          |                       | MD               | Hôpital de la Salpêtrière, Département de neurologie-centre de références des démences rares, Paris, France                 | Paris, France                            | Neurologist                                             | IFGC                                                                                       |
| Didier                            | Hannequin       |                       | MD               | Service de Neurologie, Inserm U1079, CNR-MAJ, Rouen University Hospital                                                     | Rouen, France                            | Neurologist                                             | IFGC                                                                                       |
| Véronique                         | Golfier         |                       | MD               | Service de neurologie, CH Saint Briec                                                                                       | Saint Briec, France                      | Neurologist                                             | IFGC                                                                                       |
| Martine                           | Vercelletto     |                       | MD               | Service de neurologie                                                                                                       | CHU Nantes, France                       | Neurologist                                             | IFGC                                                                                       |
| Alexis                            | Brice           |                       | MD               | Hôpital de la Salpêtrière, Département de neurologie-centre de références des démences rares, Paris, France                 | Paris, France                            | Professor in Medical Genetics                           | IFGC                                                                                       |

## Supplemental Online Content: Nonauthor Collaborators

\*First name, last name, and suffix (if applicable) are required and will appear in PubMed.

| *First Name and Middle Initial(s) | *Last Name      | *Suffix (eg, Jr, III) | Academic Degrees | Institution                                                                                                                               | Location (city, state/province, country) | Role or Contribution, eg, chair, principal investigator | Group (if more than 1 Group listed in the byline) and/or Subgroup (eg, Steering Committee) |
|-----------------------------------|-----------------|-----------------------|------------------|-------------------------------------------------------------------------------------------------------------------------------------------|------------------------------------------|---------------------------------------------------------|--------------------------------------------------------------------------------------------|
| Benedetta                         | Nacmias         |                       | PhD              | Department of Neurosciences, Psychology, Drug Research and Child Health (NEUROFARBA) University of Florence                               | Florence, Italy                          | Neurogenetics scientist                                 | IFGC                                                                                       |
| Sandro                            | Sorbi           |                       | MD               | Department of Neurosciences, Psychology, Drug Research and Child Health (NEUROFARBA) University of Florence and IRCCS "Don Carlo Gnocchi" | Florence, Italy                          | Professor of Neurology                                  | IFGC                                                                                       |
| Silvia                            | Bagnoli         |                       |                  | Department of Neurosciences, Psychology, Drug Research and Child Health (NEUROFARBA) University of Florence                               | Florence, Italy                          | Researcher                                              | IFGC                                                                                       |
| Irene                             | Piaceri         |                       | PhD              | Department of Neurosciences, Psychology, Drug Research and Child Health (NEUROFARBA) University of Florence                               | Florence, Italy                          | Researcher                                              | IFGC                                                                                       |
| Jørgen E                          | Nielsen         |                       | PhD              | Danish Dementia Research Centre, Neurogenetics Clinic, Department of Neurology, Rigshospitalet, Copenhagen University Hospital            | Copenhagen, Denmark                      | Neurologist                                             | IFGC                                                                                       |
| Lena E                            | Hjermind        |                       | MD, PhD          | Danish Dementia Research Centre, Neurogenetics Clinic, Department of Neurology, Rigshospitalet, Copenhagen University Hospital            | Copenhagen, Denmark                      | Neurologist                                             | IFGC                                                                                       |
| Matthias                          | Riemenschneider |                       | MD               | Saarland University Hospital, Department for Psychiatry & Psychotherapy                                                                   | Homburg/Saar, Germany                    | Professor of Neurology                                  | IFGC                                                                                       |
| Manuel                            | Mayhaus         |                       | PhD              | Saarland University, Laboratory for Neurogenetics                                                                                         | Homburg/Saar, Germany                    | Researcher                                              | IFGC                                                                                       |

## Supplemental Online Content: Nonauthor Collaborators

\*First name, last name, and suffix (if applicable) are required and will appear in PubMed.

| *First Name and Middle Initial(s) | *Last Name  | *Suffix (eg, Jr, III) | Academic Degrees | Institution                                                                                       | Location (city, state/province, country) | Role or Contribution, eg, chair, principal investigator | Group (if more than 1 Group listed in the byline) and/or Subgroup (eg, Steering Committee) |
|-----------------------------------|-------------|-----------------------|------------------|---------------------------------------------------------------------------------------------------|------------------------------------------|---------------------------------------------------------|--------------------------------------------------------------------------------------------|
| Bernd                             | Ibach       |                       | MD               | University Regensburg, Department of Psychiatry, Psychotherapy and Psychosomatics                 | Regensburg, Germany                      | Professor of Psychiatry                                 | IFGC                                                                                       |
| Gilles                            | Gasparoni   |                       | PhD              | Saarland University, Laboratory for Neurogenetics                                                 | Homburg/Saar, Germany                    | Researcher                                              | IFGC                                                                                       |
| Sabrina                           | Pichler     |                       |                  | Saarland University, Laboratory for Neurogenetics                                                 | Homburg/Saar, Germany                    | Researcher                                              | IFGC                                                                                       |
| Wei                               | Gu          |                       | PhD              | Saarland University, Laboratory for Neurogenetics                                                 | Homburg/Saar, Germany                    | Researcher                                              | IFGC                                                                                       |
| Martin N                          | Rossor      |                       | MD               | Dementia Research Centre, Department of Neurodegenerative Disease, UCL Institute of Neurology     | London, UK                               | Professor of Neurology                                  | IFGC                                                                                       |
| Nick C                            | Fox         |                       | MD               | Dementia Research Centre, Department of Neurodegenerative Disease, UCL Institute of Neurology     | London, UK                               | Professor of Neurology                                  | IFGC                                                                                       |
| Jason D                           | Warren      |                       | PhD              | Dementia Research Centre, Department of Neurodegenerative Disease, UCL Institute of Neurology     | London, UK                               | Professor of Neurology                                  | IFGC                                                                                       |
| Maria Grazia                      | Spillantini |                       | PhD              | University of Cambridge, Department of Clinical Neurosciences, John Van Geest Brain Repair Centre | Cambridge, UK                            | Professor of Molecular Neurology                        | IFGC                                                                                       |
| Huw R                             | Morris      |                       | PhD              | UCL, Department of Molecular Neuroscience, Russell Square House                                   | London, UK                               | Professor of clinical neuroscience                      | IFGC                                                                                       |
| Patrizia                          | Rizzu       |                       | PhD              | German Center for Neurodegenerative Diseases-Tübingen                                             | Tuebingen, Germany                       | Researcher                                              | IFGC                                                                                       |
| Peter                             | Heutink     |                       | PhD              | German Center for Neurodegenerative Diseases-Tübingen                                             | Tuebingen, Germany                       | Researcher                                              | IFGC                                                                                       |

## Supplemental Online Content: Nonauthor Collaborators

\*First name, last name, and suffix (if applicable) are required and will appear in PubMed.

| *First Name and Middle Initial(s) | *Last Name    | *Suffix (eg, Jr, III) | Academic Degrees | Institution                                                                                                      | Location (city, state/province, country) | Role or Contribution, eg, chair, principal investigator | Group (if more than 1 Group listed in the byline) and/or Subgroup (eg, Steering Committee) |
|-----------------------------------|---------------|-----------------------|------------------|------------------------------------------------------------------------------------------------------------------|------------------------------------------|---------------------------------------------------------|--------------------------------------------------------------------------------------------|
| Julie S                           | Snowden       |                       | PhD              | Institute of Brain, Behaviour and Mental Health, Faculty of Medical and Human Sciences, University of Manchester | Manchester, UK                           | Professor Neuropsychology                               | IFGC                                                                                       |
| Sara                              | Rollinson     |                       | PhD              | Institute of Brain, Behaviour and Mental Health, Faculty of Medical and Human Sciences, University of Manchester | Manchester, UK                           | Researcher                                              | IFGC                                                                                       |
| Anna                              | Richardson    |                       | MD               | Salford Royal Foundation Trust, Faculty of Medical and Human Sciences, University of Manchester                  | Manchester, UK                           | Psychiatrist                                            | IFGC                                                                                       |
| Alexander                         | Gerhard       |                       | MD               | Institute of Brain, Behaviour and Mental Health, The University of Manchester                                    | Manchester, UK                           | Researcher                                              | IFGC                                                                                       |
| Amalia C                          | Bruni         |                       | MD               | Regional Neurogenetic Centre, ASPCZ                                                                              | Lamezia Terme, Italy                     | Neurologist                                             | IFGC                                                                                       |
| Raffaele                          | Maletta       |                       | MD               | Regional Neurogenetic Centre, ASPCZ                                                                              | Lamezia Terme, Italy                     | Pathologist                                             | IFGC                                                                                       |
| Francesca                         | Frangipane    |                       | MD               | Regional Neurogenetic Centre, ASPCZ                                                                              | Lamezia Terme, Italy                     | Neurologist                                             | IFGC                                                                                       |
| Chiara                            | Cupidi        |                       | MD               | Regional Neurogenetic Centre, ASPCZ                                                                              | Lamezia Terme, Italy                     | Neurologist                                             | IFGC                                                                                       |
| Livia                             | Bernardi      |                       | PhD              | Regional Neurogenetic Centre, ASPCZ                                                                              | Lamezia Terme, Italy                     | Researcher                                              | IFGC                                                                                       |
| Maria                             | Anfossi       |                       | PhD              | Regional Neurogenetic Centre, ASPCZ                                                                              | Lamezia Terme, Italy                     | Researcher                                              | IFGC                                                                                       |
| Maura                             | Gallo         |                       | PhD              | Regional Neurogenetic Centre, ASPCZ                                                                              | Lamezia Terme, Italy                     | Researcher                                              | IFGC                                                                                       |
| Maria Elena                       | Conidi        |                       | PhD              | Regional Neurogenetic Centre, ASPCZ                                                                              | Lamezia Terme, Italy                     | Researcher                                              | IFGC                                                                                       |
| Nicoletta                         | Smirne        |                       | BSc              | Regional Neurogenetic Centre, ASPCZ                                                                              | Lamezia Terme, Italy                     | Researcher                                              | IFGC                                                                                       |
| Rosa                              | Rademakers    |                       | PhD              | Department of Neuroscience, Mayo Clinic Jacksonville                                                             | Jacksonville, FL, USA                    | Neurogeneticist                                         | IFGC                                                                                       |
| Matt                              | Baker         |                       | PhD              | Department of Neuroscience, Mayo Clinic Jacksonville                                                             | Jacksonville, FL, USA                    | Researcher                                              | IFGC                                                                                       |
| Dennis W                          | Dickson       |                       | MD               | Department of Neuroscience, Mayo Clinic Jacksonville                                                             | Jacksonville, FL, USA                    | Researcher                                              | IFGC                                                                                       |
| Neill R                           | Graff-Radford |                       | MD               | Department of Neurology, Mayo Clinic Jacksonville                                                                | Jacksonville, FL, USA                    | Researcher                                              | IFGC                                                                                       |
| Ronald C                          | Petersen      |                       | MD               | Department of Neurology, Mayo Clinic Rochester                                                                   | Rochester, MN, USA                       | Professor of Neurology                                  | IFGC                                                                                       |

## Supplemental Online Content: Nonauthor Collaborators

\*First name, last name, and suffix (if applicable) are required and will appear in PubMed.

| *First Name and Middle Initial(s) | *Last Name  | *Suffix (eg, Jr, III) | Academic Degrees | Institution                                                                                                | Location (city, state/province, country) | Role or Contribution, eg, chair, principal investigator | Group (if more than 1 Group listed in the byline) and/or Subgroup (eg, Steering Committee) |
|-----------------------------------|-------------|-----------------------|------------------|------------------------------------------------------------------------------------------------------------|------------------------------------------|---------------------------------------------------------|--------------------------------------------------------------------------------------------|
| David                             | Knopman     |                       | MD               | Department of Neurology, Mayo Clinic Rochester                                                             | Rochester, MN, USA                       | Neurologist                                             | IFGC                                                                                       |
| Keith A                           | Josephs     |                       | MD               | Department of Neurology, Mayo Clinic Rochester                                                             | Rochester, MN, USA                       | Neurologist                                             | IFGC                                                                                       |
| Bradley F                         | Boeve       |                       | MD               | Department of Neurology, Mayo Clinic Rochester                                                             | Rochester, MN, USA                       | Neurologist                                             | IFGC                                                                                       |
| Joseph E                          | Parisi      |                       | MD               | Department of Neurology, Mayo Clinic Rochester                                                             | Rochester, MN, USA                       | Pathologist                                             | IFGC                                                                                       |
| William W                         | Seeley      |                       | MD               | Department of Neurology, University of California                                                          | San Francisco, CA, USA                   | Professor of Neurology                                  | IFGC                                                                                       |
| Bruce L                           | Miller      |                       | MD               | Memory and Aging Center, Department of Neurology, University of California                                 | San Francisco, CA, USA                   | Professor of Neurology                                  | IFGC                                                                                       |
| Anna M                            | Karydas     |                       |                  | Memory and Aging Center, Department of Neurology, University of California                                 | San Francisco, CA, USA                   | Researcher                                              | IFGC                                                                                       |
| Howard                            | Rosen       |                       | MD               | Memory and Aging Center, Department of Neurology, University of California                                 | San Francisco, CA, USA                   | Professor of Neurology                                  | IFGC                                                                                       |
| John C                            | van Swieten |                       | MD, PhD          | Department of Neurology, Erasmus Medical Centre                                                            | Rotterdam, The Netherlands               | Professor of genetics                                   | IFGC                                                                                       |
| Elise GP                          | Dopper      |                       | PhD              | Department of Neurology, Erasmus Medical Centre                                                            | Rotterdam, The Netherlands               | Researcher                                              | IFGC                                                                                       |
| Harro                             | Seelaar     |                       | PhD              | Department of Neurology, Erasmus Medical Centre                                                            | Rotterdam, The Netherlands               | Neurologist                                             | IFGC                                                                                       |
| Yolande AL                        | Pijnenburg  |                       | MD, PhD          | Alzheimer Centre and department of neurology, VU University medical centre                                 | Amsterdam, The Netherlands               | Professor of Neurology                                  | IFGC                                                                                       |
| Philip                            | Scheltens   |                       | MD, PhD          | Alzheimer Centre and department of neurology, VU University medical centre                                 | Amsterdam, The Netherlands               | Professor of Neurology                                  | IFGC                                                                                       |
| Giancarlo                         | Logroscino  |                       | MD               | Department of Basic Medical Sciences, Neurosciences and Sense Organs of the "Aldo Moro" University of Bari | Bari, Italy                              | Professor of Neurology                                  | IFGC                                                                                       |

## Supplemental Online Content: Nonauthor Collaborators

\*First name, last name, and suffix (if applicable) are required and will appear in PubMed.

| *First Name and Middle Initial(s) | *Last Name  | *Suffix (eg, Jr, III) | Academic Degrees | Institution                                                                                                              | Location (city, state/province, country) | Role or Contribution, eg, chair, principal investigator | Group (if more than 1 Group listed in the byline) and/or Subgroup (eg, Steering Committee) |
|-----------------------------------|-------------|-----------------------|------------------|--------------------------------------------------------------------------------------------------------------------------|------------------------------------------|---------------------------------------------------------|--------------------------------------------------------------------------------------------|
| Rosa                              | Capozzo     |                       | MD               | Department of Basic Medical Sciences, Neurosciences and Sense Organs of the "Aldo Moro" University of Bari               | Bari, Italy                              | Neurologist                                             | IFGC                                                                                       |
| Valeria                           | Novelli     |                       | MD               | Medical Genetics Unit, Fondazione Policlinico Universitario A. Gemelli                                                   | Rome, Italy                              | Researcher                                              | IFGC                                                                                       |
| Annibale A                        | Puca        |                       | MD               | Cardiovascular Research Unit, IRCCS Multimedica, Milan, Italy; Department of Medicine and Surgery, University of Salerno | Baronissi, SA, Italy                     | Professor of Medical Genetics                           | IFGC                                                                                       |
| Massimo                           | Franceschi  |                       | MD               | Neurology Dept, IRCCS Multimedica                                                                                        | Milan, Italy                             | Neurologist                                             | IFGC                                                                                       |
| Alfredo                           | Postiglione |                       | MD               | Department of Clinical Medicine and Surgery, University of Naples Federico II                                            | Naples, Italy                            | Researcher                                              | IFGC                                                                                       |
| Graziella                         | Milan       |                       | MD               | Geriatric Center Frullone- ASL Napoli 1 Centro                                                                           | Naples, Italy                            | Neurologist                                             | IFGC                                                                                       |
| Paolo                             | Sorrentino  |                       | MD               | Geriatric Center Frullone- ASL Napoli 1 Centro                                                                           | Naples, Italy                            | Researcher                                              | IFGC                                                                                       |
| Mark                              | Kristiansen |                       | PhD              | UCL Genomics, Institute of Child Health (ICH) UCL                                                                        | London, UK                               | Researcher                                              | IFGC                                                                                       |
| Huei-Hsin                         | Chiang      |                       | PhD              | Karolinska Institutet, Dept NVS, Alzheimer Research Center                                                               | Stockholm, Sweden                        | Researcher                                              | IFGC                                                                                       |
| Caroline                          | Graff       |                       | PhD              | Karolinska Institutet, Dept NVS, Alzheimer Research Center                                                               | Stockholm, Sweden                        | Professor of genetic dementia                           | IFGC                                                                                       |
| Florence                          | Pasquier    |                       | MD               | University of Lille                                                                                                      | Lille, France                            | Professor                                               | IFGC                                                                                       |
| Adeline                           | Rollin      |                       | MD               | University of Lille                                                                                                      | Lille, France                            | Neurologist                                             | IFGC                                                                                       |
| Vincent                           | Deramecourt |                       | MD               | University of Lille                                                                                                      | Lille, France                            | Neurologist                                             | IFGC                                                                                       |
| Thibaud                           | Lebouvier   |                       | MD               | University of Lille                                                                                                      | Lille, France                            | Professor of Neurology                                  | IFGC                                                                                       |
| Dimitrios                         | Kapogiannis |                       | MD               | National Institute on Aging (NIA/NIH)                                                                                    | Baltimore, MD, USA                       | Neurologist                                             | IFGC                                                                                       |
| Luigi                             | Ferrucci    |                       | MD               | Clinical Research Branch, National Institute on Aging                                                                    | Baltimore, MD, USA                       | Scientific director NIA                                 | IFGC                                                                                       |

## Supplemental Online Content: Nonauthor Collaborators

\*First name, last name, and suffix (if applicable) are required and will appear in PubMed.

| *First Name and Middle Initial(s) | *Last Name      | *Suffix (eg, Jr, III) | Academic Degrees | Institution                                                                                                      | Location (city, state/province, country) | Role or Contribution, eg, chair, principal investigator | Group (if more than 1 Group listed in the byline) and/or Subgroup (eg, Steering Committee) |
|-----------------------------------|-----------------|-----------------------|------------------|------------------------------------------------------------------------------------------------------------------|------------------------------------------|---------------------------------------------------------|--------------------------------------------------------------------------------------------|
| Stuart                            | Pickering-Brown |                       | PhD              | Institute of Brain, Behaviour and Mental Health, Faculty of Medical and Human Sciences, University of Manchester | Manchester, UK                           | Professor of Neurogenetics                              | IFGC                                                                                       |
| Andrew B                          | Singleton       |                       | PhD              | Laboratory of Neurogenetics, National Institute on Aging, National Institutes of Health                          | Bethesda, MD, USA                        | Researcher                                              | IFGC                                                                                       |
| John                              | Hardy           |                       | PhD              | Department of Molecular Neuroscience, UCL                                                                        | London, UK                               | Professor of mol.biology                                | IFGC                                                                                       |
| Parastoo                          | Momeni          |                       | PhD              | Laboratory of Neurogenetics, Department of Internal Medicine, Texas Tech University Health Science Center        | Lubbock, Texas, USA                      | Researcher                                              | IFGC                                                                                       |
| Henryk                            | Barthel         |                       | MD               | Nuclear Medicine Department, University Hospital Leipzig                                                         | Leipzig, Germany                         | Professor                                               | FTLD-C                                                                                     |
| Semler                            | Elisa           |                       | PhD              | Department of Neurology, University clinic Ulm                                                                   | Ulm, Germany                             | researcher                                              | FTLD-C                                                                                     |
| Lombardi                          | Jolina          |                       | PhD              | Department of Neurology, University clinic Ulm                                                                   | Ulm, Germany                             | researcher                                              | FTLD-C                                                                                     |
| von Arnim                         | Christine       |                       | MD               | Department of Geriatrics, University clinic Goettingen                                                           | Goettingen, Germany                      | Professor                                               | FTLD-C                                                                                     |
| Oberhauser                        | Felix           |                       | MD               | Department of Psychiatry, University clinic Erlangen                                                             | Erlangen, Germany                        | researcher                                              | FTLD-C                                                                                     |
| Schumacher                        | Kai             |                       | MD               | Department of Psychiatry, University clinic Erlangen                                                             | Erlangen, Germany                        | Researcher                                              | FTLD-C                                                                                     |
| Lehmbeck                          | Jan             |                       | MD               | Department of Psychiatry, University clinic Erlangen                                                             | erlangen, Germany                        | researcher                                              | FTLD-C                                                                                     |
| Maler                             | Juan-Manuel     |                       | MD               | Department of Psychiatry, University clinic Erlangen                                                             | Erlangen, Germany                        | Professor                                               | FTLD-C                                                                                     |
| Richter-Schmidinger               | Tanja           |                       | PhD              | Department of Psychiatry, University clinic Erlangen                                                             | erlangen, Germany                        | Researcher                                              | FTLD-C                                                                                     |

## Supplemental Online Content: Nonauthor Collaborators

\*First name, last name, and suffix (if applicable) are required and will appear in PubMed.

| *First Name and Middle Initial(s) | *Last Name | *Suffix (eg, Jr, III) | Academic Degrees | Institution                                           | Location (city, state/province, country) | Role or Contribution, eg, chair, principal investigator | Group (if more than 1 Group listed in the byline) and/or Subgroup (eg, Steering Committee) |
|-----------------------------------|------------|-----------------------|------------------|-------------------------------------------------------|------------------------------------------|---------------------------------------------------------|--------------------------------------------------------------------------------------------|
| Hammer-Kasperei                   | Anke       |                       | PhD              | Department of Psychiatry, University clinic Erlangen  | Erlangen, Germany                        | Researcher                                              | FTLD-C                                                                                     |
| Oberstein                         | Timo       |                       | MD               | Department of Psychiatry, University clinic Erlangen  | Erlangen, Germany                        | Researcher                                              | FTLD-C                                                                                     |
| Müller-Sarnowski                  | Felix      |                       | MD               | Department of Psychiatry, TU Munich                   | Munich, Germany                          | Researcher                                              | FTLD-C                                                                                     |
| Roßmeier                          | Carola     |                       | MD               | Department of Psychiatry, TU Munich                   | Munich, Germany                          | Researcher                                              | FTLD-C                                                                                     |
| Ludolph                           | Albert     |                       | MD               | Department of Neurology, University clinic Ulm        | Ulm, Germany                             | Professor                                               | FTLD-C                                                                                     |
| Kassubek                          | Jan        |                       | MD               | Department of Neurology, University clinic Ulm        | Ulm, Germany                             | Professor                                               | FTLD-C                                                                                     |
| Schneider                         | Anja       |                       | MD               | Department of Psychiatry, University clinic Bonn      | Bonn, Germany                            | Professor                                               | FTLD-C                                                                                     |
| Levin                             | Johannes   |                       | MD               | Department of Neurology, University clinic LMU Munich | Munich, Germany                          | Professor                                               | FTLD-C                                                                                     |
